# Supplementary material for: Identification and Profiling of microRNAs in Goat Endometrium during Embryo Implantation
Source: PLoS One. 2015 Apr 17;10(4):e0122202. doi: 10.1371/journal.pone.0122202 (PMC4401794; doi:10.1371/journal.pone.0122202)
Supplement: S2 Table — (XLS) [file pone.0122202.s002.xls]

## Sheet: Sheet1
Table S2 Conservation of the identified miRNA with other species.
Species	Organism	Common name	count	miRs
bta	Bos taurus	Cow	295	bta-mir-125b-2,bta-mir-155,bta-mir-2285f-1,bta-mir-6529,bta-mir-1-1,bta-mir-10b,bta-mir-26a-1,bta-mir-27a,bta-mir-29d,bta-mir-30f,bta-mir-30b,bta-mir-30e,bta-mir-34b,bta-mir-34c,bta-mir-34a,bta-mir-100,bta-mir-103-2,bta-mir-103-1,bta-mir-105a,bta-mir-18b,bta-mir-122,bta-mir-126,bta-mir-128-2,bta-mir-133a-2,bta-mir-133a-1,bta-mir-133b,bta-mir-135a-1,bta-mir-135b,bta-mir-138-1,bta-mir-138-2,bta-mir…
hsa	Homo sapiens	Human	281	hsa-mir-125b-2,hsa-mir-155,hsa-mir-7641-2,hsa-mir-1-1,hsa-mir-1-2,hsa-mir-9-3,hsa-mir-9-2,hsa-mir-9-1,hsa-mir-10a,hsa-mir-10b,hsa-mir-23b,hsa-mir-26b,hsa-mir-26a-2,hsa-mir-26a-1,hsa-mir-27a,hsa-mir-29c,hsa-mir-30c-1,hsa-mir-30c-2,hsa-mir-30b,hsa-mir-30d,hsa-mir-30e,hsa-mir-30a,hsa-mir-34c,hsa-mir-34a,hsa-mir-100,hsa-mir-103a-1,hsa-mir-103a-2,hsa-mir-105-2,hsa-mir-105-1,hsa-mir-106a,hsa-mir-20a,hs…
mmu	Mus musculus	Mouse	250	mmu-mir-99a,mmu-mir-125b-2,mmu-let-7c-1,mmu-mir-1a-2,mmu-mir-1a-1,mmu-mir-9-3,mmu-mir-9-2,mmu-mir-10a,mmu-mir-10b,mmu-mir-22,mmu-mir-23b,mmu-mir-26b,mmu-mir-26a-1,mmu-mir-26a-2,mmu-mir-27a,mmu-mir-29a,mmu-mir-30c-1,mmu-mir-30c-2,mmu-mir-30b,mmu-mir-30e,mmu-mir-30d,mmu-mir-30a,mmu-mir-34b,mmu-mir-34c,mmu-mir-34a,mmu-mir-100,mmu-mir-103-2,mmu-mir-107,mmu-mir-103-1,mmu-mir-17,mmu-mir-20a,mmu-mir-18a…
cfa	Canis familiaris	Dog	193	cfa-mir-99a-1,cfa-mir-125b-2,cfa-mir-155,cfa-let-7c,cfa-mir-1-2,cfa-mir-1-1,cfa-mir-9-3,cfa-mir-9-2,cfa-mir-9-1,cfa-mir-10a,cfa-mir-10b,cfa-mir-22,cfa-mir-23b,cfa-mir-26b,cfa-mir-26a-1,cfa-mir-26a-2,cfa-mir-27a,cfa-mir-29c-2,cfa-mir-29a,cfa-mir-30c-1,cfa-mir-30c-2,cfa-mir-30b,cfa-mir-30e,cfa-mir-30d,cfa-mir-30a,cfa-mir-34b,cfa-mir-34c,cfa-mir-34a,cfa-mir-103-2,cfa-mir-103-1,cfa-mir-107,cfa-mir-10…
ssc	Sus scrofa	Pig	189	ssc-mir-99a,ssc-mir-155,ssc-let-7c,ssc-mir-1,ssc-mir-9-3,ssc-mir-10a,ssc-mir-10b,ssc-mir-22,ssc-mir-23b,ssc-mir-27a,ssc-mir-29a,ssc-mir-30c-2,ssc-mir-30c-1,ssc-mir-30b,ssc-mir-30d,ssc-mir-30e,ssc-mir-30a,ssc-mir-34c-2,ssc-mir-34c-1,ssc-mir-34a,ssc-mir-100,ssc-mir-103-2,ssc-mir-103-1,ssc-mir-107,ssc-mir-105-2,ssc-mir-106a,ssc-mir-17,ssc-mir-18b,ssc-mir-125b-1,ssc-mir-126,ssc-mir-128-2,ssc-mir-133a…
eca	Equus caballus	Horse	172	eca-mir-99a-2,eca-mir-125b-2,eca-mir-155,eca-mir-703,eca-let-7c,eca-mir-1-1,eca-mir-1-2,eca-mir-9a-2,eca-mir-9a,eca-mir-10a,eca-mir-10b,eca-mir-23b,eca-mir-26a-2,eca-mir-27a,eca-mir-29c-2,eca-mir-29a,eca-mir-30c-2,eca-mir-30b,eca-mir-30d,eca-mir-34b,eca-mir-34a,eca-mir-100,eca-mir-103,eca-mir-107a,eca-mir-105,eca-mir-17,eca-mir-106a,eca-mir-18b,eca-mir-18a,eca-mir-122,eca-mir-125b,eca-mir-126,eca…
ptr	Pan troglodytes	Common Chimpanzee	172	ptr-mir-155,ptr-let-7c,ptr-mir-1-1,ptr-mir-1-2,ptr-mir-9-1,ptr-mir-10a,ptr-mir-10b,ptr-mir-26b,ptr-mir-26a-2,ptr-mir-29c,ptr-mir-30c-1,ptr-mir-30e,ptr-mir-34c,ptr-mir-103-2,ptr-mir-18b,ptr-mir-122,ptr-mir-126,ptr-mir-128-2,ptr-mir-133a-2,ptr-mir-133b,ptr-mir-135a-1,ptr-mir-135b,ptr-mir-153,ptr-mir-181b-2,ptr-mir-181b-1,ptr-mir-181d,ptr-mir-192,ptr-mir-215,ptr-mir-195,ptr-mir-199a-1,ptr-mir-199b,p…
rno	Rattus norvegicus	Rat	172	rno-mir-99a,rno-mir-125b-2,rno-mir-9a-3,rno-mir-10b,rno-mir-22,rno-mir-23b,rno-mir-26b,rno-mir-26a,rno-mir-27a,rno-mir-30c-2,rno-mir-30b,rno-mir-30a,rno-mir-34a,rno-mir-100,rno-mir-107,rno-mir-105,rno-mir-20a,rno-mir-17-1,rno-mir-17-2,rno-mir-122,rno-mir-125b-1,rno-mir-126a,rno-mir-126b,rno-mir-128-2,rno-mir-133a,rno-mir-135b,rno-mir-138-2,rno-mir-138-1,rno-mir-140,rno-mir-151,rno-mir-181a-1,rno-…
cgr	Cricetulus griseus	Chinese Hamster	146	cgr-mir-99a,cgr-mir-125b,cgr-let-7c,cgr-mir-9,cgr-mir-10a,cgr-mir-10b,cgr-mir-100,cgr-mir-22,cgr-mir-23b,cgr-mir-26b,cgr-mir-26a,cgr-mir-27a,cgr-mir-29c,cgr-mir-29a,cgr-mir-30c,cgr-mir-30b,cgr-mir-30e,cgr-mir-30a,cgr-mir-30d,cgr-mir-34b,cgr-mir-34c,cgr-mir-34a,cgr-mir-107,cgr-mir-103,cgr-mir-20a,cgr-mir-17,cgr-mir-18a,cgr-mir-122,cgr-mir-126,cgr-mir-128,cgr-mir-138,cgr-mir-140,cgr-mir-151,cgr-mir…
oan	Ornithorhynchus anatinus	Platypus	137	oan-let-7c-1,oan-mir-1a,oan-mir-9-1,oan-mir-9-2,oan-mir-10a,oan-mir-10b,oan-mir-22,oan-mir-26-2,oan-mir-26-1,oan-mir-27a,oan-mir-29a-1,oan-mir-29a-2,oan-mir-30c-2,oan-mir-30c-1,oan-mir-30b,oan-mir-30e,oan-mir-30d,oan-mir-30a,oan-mir-34b,oan-mir-34a,oan-mir-100,oan-mir-103-1,oan-mir-103-2,oan-mir-107,oan-mir-106,oan-mir-20a-2,oan-mir-17,oan-mir-18,oan-mir-122,oan-mir-125,oan-mir-126,oan-mir-128-1,…
mdo	Monodelphis domestica	Gray Short-tailed Opossum	134	mdo-mir-125b-1,mdo-mir-1-2,mdo-mir-1-1,mdo-mir-9a-1,mdo-mir-9a-3,mdo-mir-10a,mdo-mir-10b,mdo-mir-22,mdo-mir-23b,mdo-mir-26-3,mdo-mir-26-2,mdo-mir-26-1,mdo-mir-27a,mdo-mir-29a-1,mdo-mir-29a-2,mdo-mir-30c-1,mdo-mir-30c-2,mdo-mir-30b,mdo-mir-30d,mdo-mir-30a,mdo-mir-34c,mdo-mir-34b,mdo-mir-34a,mdo-mir-100,mdo-mir-103-2,mdo-mir-107,mdo-mir-103-1,mdo-mir-17,mdo-mir-20a,mdo-mir-106,mdo-mir-18b,mdo-mir-1…
ggo	Gorilla gorilla	Gorilla	120	ggo-mir-155,ggo-let-7c,ggo-mir-1,ggo-mir-10b,ggo-mir-22,ggo-mir-23b,ggo-mir-26b,ggo-mir-29c,ggo-mir-30c,ggo-mir-30b,ggo-mir-30e,ggo-mir-34c,ggo-mir-18b,ggo-mir-122,ggo-mir-128,ggo-mir-133b,ggo-mir-135b,ggo-mir-138,ggo-mir-140,ggo-mir-151a,ggo-mir-181a-1,ggo-mir-181a-2,ggo-mir-181d,ggo-mir-192,ggo-mir-215,ggo-mir-195,ggo-mir-200a,ggo-mir-141,ggo-mir-202,ggo-mir-299,ggo-mir-329b,ggo-mir-338,ggo-mir…
mml	Macaca mulatta	Rhesus Monkey	111	mml-mir-6529,mml-mir-1-1,mml-mir-1-2,mml-mir-9-3,mml-mir-10a,mml-mir-30c-2,mml-mir-30d,mml-mir-30e,mml-mir-30a,mml-mir-34c,mml-mir-34a,mml-mir-100,mml-mir-122a,mml-mir-126,mml-mir-133d,mml-mir-133b,mml-mir-28,mml-mir-181a-2,mml-mir-181b-1,mml-mir-181c,mml-mir-181d,mml-mir-184,mml-mir-187,mml-mir-192,mml-mir-215,mml-mir-194-2,mml-mir-195,mml-mir-199a-2,mml-mir-200a,mml-mir-141,mml-mir-205,mml-mir-…
ppy	Pongo pygmaeus	Orangutan	91	ppy-mir-99a,ppy-mir-155,ppy-mir-9-2,ppy-mir-10a,ppy-mir-10b,ppy-mir-27a,ppy-mir-17,ppy-mir-126,ppy-mir-133a,ppy-mir-133b,ppy-mir-135b,ppy-mir-151a,ppy-mir-28,ppy-mir-181b,ppy-mir-181b-2,ppy-mir-181c,ppy-mir-181d,ppy-mir-187,ppy-mir-215,ppy-mir-194,ppy-mir-199b,ppy-mir-200a,ppy-mir-141,ppy-mir-202,ppy-mir-205,ppy-mir-299,ppy-mir-329-1,ppy-mir-329-2,ppy-mir-338,ppy-mir-339,ppy-mir-362,ppy-mir-374a,…
oar	Ovis aries	Sheep	74	oar-mir-99a,oar-let-7c,oar-mir-10a,oar-mir-10b,oar-mir-22,oar-mir-23b,oar-mir-26b,oar-mir-26a,oar-mir-27a,oar-mir-29a,oar-mir-30c,oar-mir-30b,oar-mir-30d,oar-mir-30a,oar-mir-103,oar-mir-107,oar-mir-106a,oar-mir-17,oar-mir-125b,oar-mir-133,oar-mir-154b,oar-mir-181a-1,oar-mir-181a-2,oar-mir-194,oar-mir-199a,oar-mir-200a,oar-mir-299,oar-mir-329a,oar-mir-329b,oar-mir-362,oar-mir-369,oar-mir-374a,oar-…
sha	Sarcophilus harrisii	Tasmanian devil	45	sha-mir-9,sha-mir-10a,sha-mir-10b,sha-mir-23b,sha-mir-30c,sha-mir-30e,sha-mir-100,sha-mir-125b,sha-mir-125a,sha-mir-126,sha-mir-128,sha-mir-133a,sha-mir-135a,sha-mir-138-1,sha-mir-138-2,sha-mir-140,sha-mir-181a-2,sha-mir-181a-1,sha-mir-190,sha-mir-199a,sha-mir-200a,sha-mir-141,sha-mir-202,sha-mir-205,sha-mir-222,sha-mir-338,sha-let-7a,sha-let-7g,sha-mir-7,sha-mir-19b,sha-mir-23a,sha-mir-24-2,sha-…
age	Ateles geoffroyi	Spider monkey	16	age-mir-10a,age-mir-27a,age-mir-30b,age-mir-34a,age-mir-100,age-mir-205,age-mir-222,age-mir-513a-2,age-mir-513c-2,age-mir-513a-1,age-mir-513c-1,age-mir-19a,age-mir-19b-2,age-mir-23a,age-mir-124a,age-mir-196
mne	Macaca nemestrina	Pig-tailed macaque	11	mne-mir-10b,mne-mir-26a,mne-mir-27a,mne-mir-140,mne-mir-28,mne-mir-181a-2,mne-mir-7-2,mne-mir-19a,mne-mir-197,mne-mir-211,mne-mir-218-1
sla	Saguinus labiatus	White-lipped Tamarin	10	sla-mir-22,sla-mir-34a,sla-mir-100,sla-mir-28,sla-mir-181a-2,sla-mir-7,sla-mir-19b-2,sla-mir-96,sla-mir-183,sla-mir-218-2
lla	Lagothrix lagotricha	Woolly monkey	8	lla-mir-34a,lla-mir-135-2,lla-mir-199a,lla-mir-205,lla-mir-16,lla-mir-106b,lla-mir-124a,lla-mir-196
lca	Lemur catta	Ring-tailed Lemur	8	lca-mir-27a,lca-mir-20,lca-mir-16,lca-mir-19b-2,lca-mir-19b-1,lca-mir-23a,lca-mir-92-2,lca-mir-218
ppa	Pan paniscus	Pygmy Chimpanzee	7	ppa-mir-10a,ppa-mir-34a,ppa-mir-125b,ppa-mir-135-1,ppa-mir-141,ppa-mir-7-2,ppa-mir-144
aja	Artibeus jamaicensis	Mexican fruit bat	5	aja-mir-21,aja-mir-143,aja-mir-144,aja-mir-331,aja-mir-671
